# Supplementary material
Source: PubMed Central journal article supplement (PMC2626728)
Supplement: 0811212106_0811212106SI.pdf [file 0811212106_0811212106SI.pdf]

# Supporting Information

Rahdar *et al.* 10.1073/pnas.0811212106

## SI Materials and Methods

**Plasmids.** PTEN<sub>1-351</sub>-CFP was constructed by fusion PCR using the following internal primers: 5'-CTT GCT CAC CAT GCC GCC TAC TGT TTT TGT GAA GTA-3' and 5'-ACA GTA GGC GGC ATG GTG AGC AAG-3'. The final PCR product was then TOPO cloned into pcDNA3.1D (Invitrogen) following the manufacturer's protocol. PTEN<sub>352-403</sub>-YFP and PTEN<sub>352-403(A4)</sub>-YFP were respectively PCR amplified and TOPO cloned into pcDNA3.1D. PTEN<sub>1-351(CBR3)</sub>-YFP was generated by multi-site mutagenesis of PTEN<sub>1-351</sub>-CFP-FLAG using the following oligonucleotides: 5'-GGT GAT ATC AAA GTA GAG TTC TTC CAC GCA CAG AAC GCG ATG CTA GCA GCG GAC GCA ATG TTT CAC TTT TGG-3' and 5'-CCA AAA GTG AAA CAT TGC GTC CGC TGC TAG CAT CGC GTT CTG TGC GTG GAA GAA CTC TAC TTT GAT ATC ACC-3'. PTEN<sub>10-351</sub>-CFP was generated by PCR using N-terminal truncation forward oligonucleotide and CFP reverse oligonucleotide and amplified using PTEN<sub>1-351</sub>-CFP cDNA. All GFP variants contain monomeric A206K mutation.

**Cell Cultures.** HEK293T cells were maintained in DMEM (Invitrogen) supplemented with 10% FBS (Invitrogen). U87MG cells (American Type Culture Collection no. HTB-14) were maintained in Eagle minimal essential medium (American Type Culture Collection) supplemented with 10% FBS. HEK293T cells were transiently transfected on 100-mm dishes with 8  $\mu$ g of DNA using Polyfect transfection reagent (Qiagen) following the manufacturer's protocol. Cells were then incubated in complete media for 20 h before usage. U87MG cells were transiently transfected on 100-mm dishes with 10  $\mu$ g of DNA using Fugene HD transfection reagent (Roche) with a ratio of 5 ( $\mu$ L Fugene to 2  $\mu$ g DNA) following the manufacturer's protocol. Cells were then incubated in complete media for 48 h before use.

**Microscopy.** Cells were seeded on four-welled chambered cover-glass (Nunc International) and transfected with appropriate cDNA constructs. Wells were washed and imaged with Hanks' balanced salt solution (Invitrogen) supplemented with 1g/L glucose and 25 mM Hepes. Fluorescent images were acquired using an Olympus IX71 inverted microscope and captured on an EMCCD camera (Photometric). CFP and YFP images were acquired by excitation/emission transmission at 457/470 nm and 514/535 nm, respectively.

**Stimulation.** U87MG cells were seeded on four-welled chambered cover-glass and transfected with respective constructs for 24 h using the protocol described earlier. Cells were then serum starved for 20 h. Wells were washed and imaged as previously described. The cells were stimulated with 20 ng/mL epidermal growth factor (E9644; Sigma).

**Immunoprecipitation.** HEK293T cells expressing respective constructs were lysed in buffer containing 10 mM Tris-HCl (pH 7.5), 140 mM NaCl, 5 mM EDTA, and 0.1% Nonidet P-40, and supplemented with 1 mM DTT, as well as phosphatase and protease inhibitor mixture (Sigma). The lysate was then cleared by centrifugation for 10 min  $8,200 \times g$  at 4 °C. The supernatant was then added to washed anti-FLAG affinity resin (Sigma) and gently inverted for 2 h. Approximately 10% of cleared whole cell lysate was used for input analysis. The resin containing bound antigen was then washed twice by inversion with lysis buffer for 5 min at 4 °C. The final wash supernatant was discarded and the resin was suspended in sample buffer and boiled.

**Western Blotting.** Samples were resolved by 4% to 15% Tris-HCl SDS/PAGE gel electrophoresis and transferred onto nitrocellulose (BioRad). GFP was detected using anti-GFP antibody. GFP antibody displayed equal affinity for CFP and YFP variants. Phosphorylation states of PTEN<sub>352-403</sub> was detected using phospho-PTEN (S380)-specific antibodies (Cell Signaling Technology). All Western blots were resolved by using HRP-conjugated secondary antibody with an ECL detection system (GE Healthcare).

**iRap.** Inducible PIP<sub>2</sub> depletion using CFP-FKBP-Inp54p, and dual color (i.e., CFP/YFP) confocal imaging of cells have been described previously (34). Briefly, HeLa cells were transfected with dimerization probes, CFP-FKBP-Inp54p and Lyn11-FRB together with YFP-labeled PTEN<sub>C124S,A4</sub>. Cells were treated with iRap, which triggered a rapid translocation of CFP-FKBP-Inp54p to the plasma membrane. Examination of cells co-expressing PH<sub>PLC $\beta$ 8</sub>, a probe for PIP<sub>2</sub>, showed that PIP<sub>2</sub> levels decreased by 84% within 2 min of iRap addition. Fluorescent signals from CFP and YFP in HeLa cells were alternately collected every 30 seconds on a spinning-disk confocal microscope (Yokogawa).

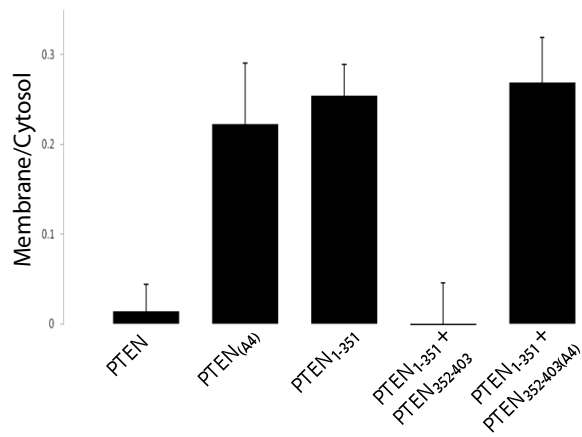

**Fig. S1.** Membrane localization of PTEN<sup>1-351</sup>-CFP is inhibited by PTEN<sup>352-403</sup>-YFP. Membrane-to-cytosol ratio of respective experiments was calculated using the method referenced by Janetopoulos *et al.* (2005) *Dev Cell* 8:467–477.

PH<sub>AKT</sub>-GFP

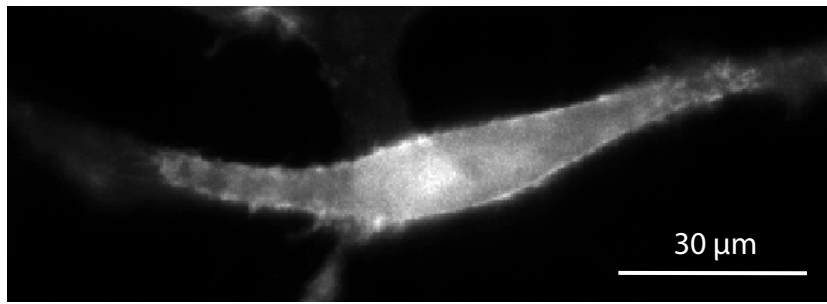

**Fig. S2.** PH<sub>AKT</sub>-GFP localizes to the U87 plasma membrane. U87 cells were transfected with PH<sub>AKT</sub>-GFP and localization of the probe was assessed.

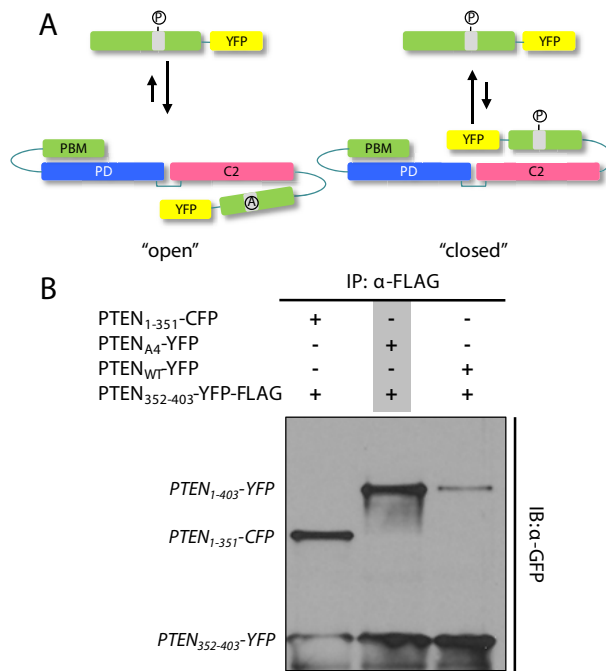

**Fig. S3.** Exogenous C-terminal tail of PTEN preferentially associates with “open” PTEN. (A) Schematic representation of the strategy used to assess the relative interaction of exogenous C-terminal tail with PTEN<sub>1-351</sub>-CFP, PTEN<sub>A4</sub>-YFP, and PTEN<sub>WT</sub>-YFP. (B) Competition of endogenous carboxy-terminal domain with exogenous co-expressed PTEN<sub>352-403</sub>-YFP-FLAG was assessed by co-transfection with PTEN<sub>1-351</sub>-CFP, PTEN<sub>A4</sub>-YFP, or PTEN<sub>WT</sub>-YFP in HEK293T cells. Cell lysates were immunoprecipitated using anti-FLAG affinity beads, and analyzed by Western blot using anti-GFP antibody.

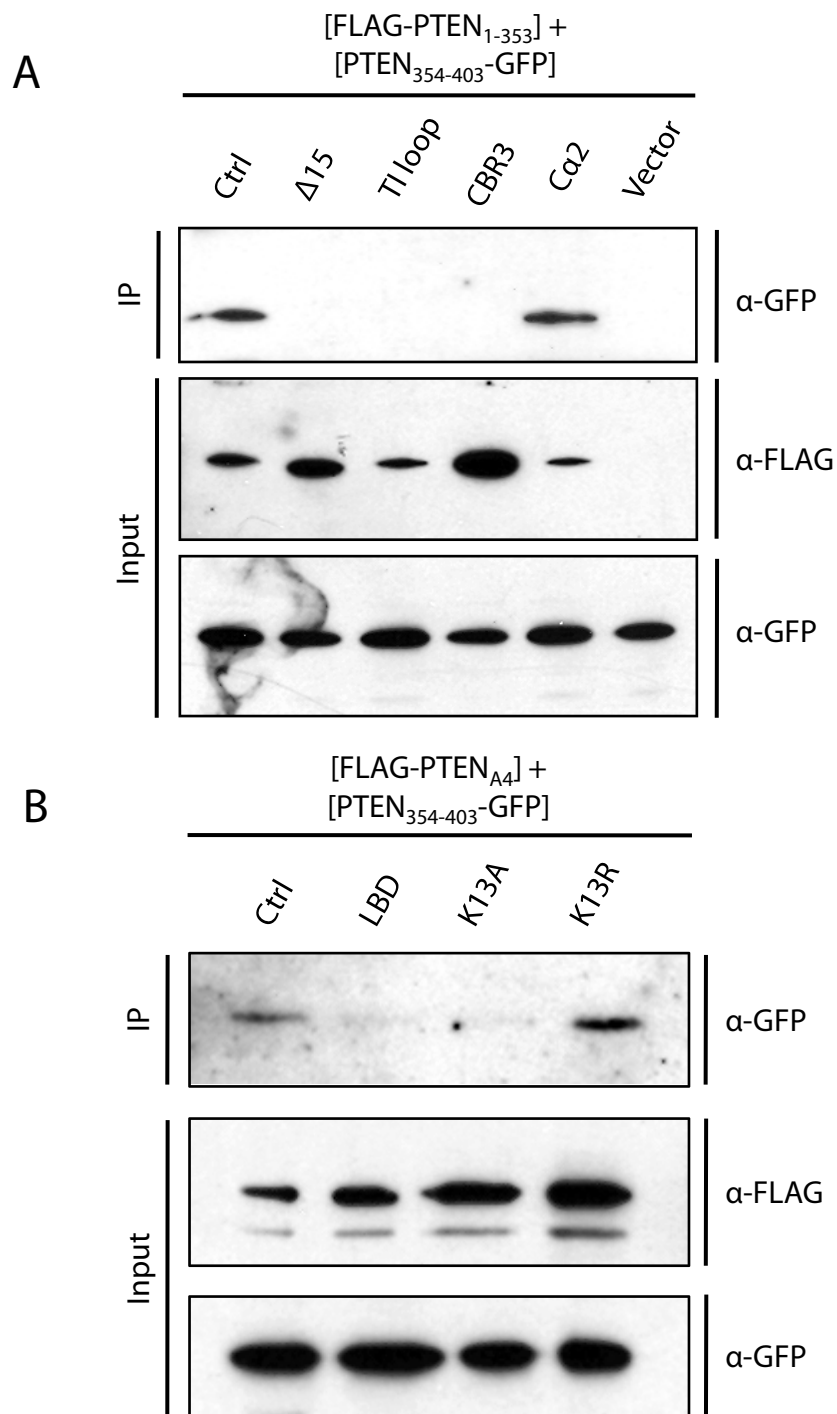

**Fig. S4.** Perturbations of the lipid binding domain and the TI and CBR3 loops disrupt the intramolecular interaction of PTEN<sub>1-353</sub> with PTEN<sub>354-403</sub>. Experiments were carried out similarly to previous immunoprecipitations in Figs. 3–5. (A) The interaction of FLAG-PTEN<sub>1-353</sub> and PTEN<sub>354-403</sub>-GFP was assessed (i.e., control). This interaction was also tested after deletion of the first 15 N-terminal residues of FLAG-PTEN<sub>1-353</sub> (i.e., control), after substitutions of the TI (R161A, K163A, and K164A) and CBR3 (K263A, M264A, L265G, K266A, K267A, and K269A) loops, or perturbation of Ca<sub>2</sub> (K327A, N329A, K330A, K332A, and R335A). (B) The interaction of FLAG-PTEN<sub>A4</sub> and PTEN<sub>354-403</sub>-GFP was analyzed after substitutions of K13R, R14A, and R15A in FLAG-PTEN<sub>A4</sub> (i.e., LBD) or single substitutions K13A and K13R.

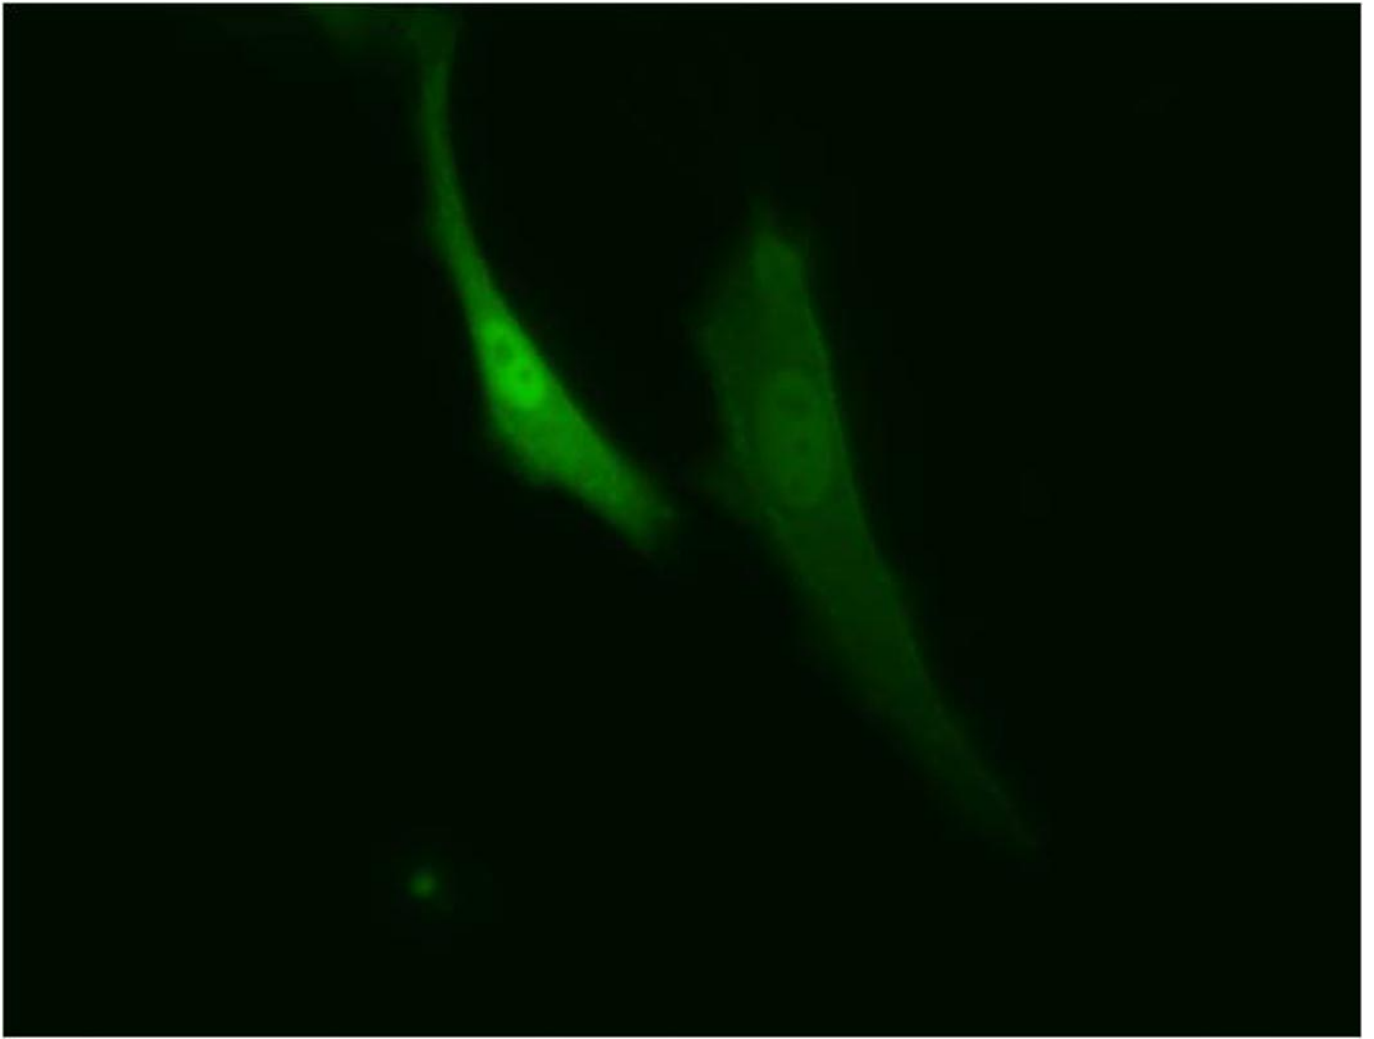

**Movie S1.** PH<sub>AKT</sub>-GFP translocation in U87 cells expressing PTEN<sub>WT</sub>. U87 cells co-transfected with PTEN<sub>WT</sub> and PH<sub>AKT</sub>-GFP. The cells were serum starved 20 h and treated with 20 ng/mL EGF. Localization of the PIP<sub>3</sub> probe PH<sub>AKT</sub>-GFP was assessed.

[Movie S1 \(MOV\)](#)

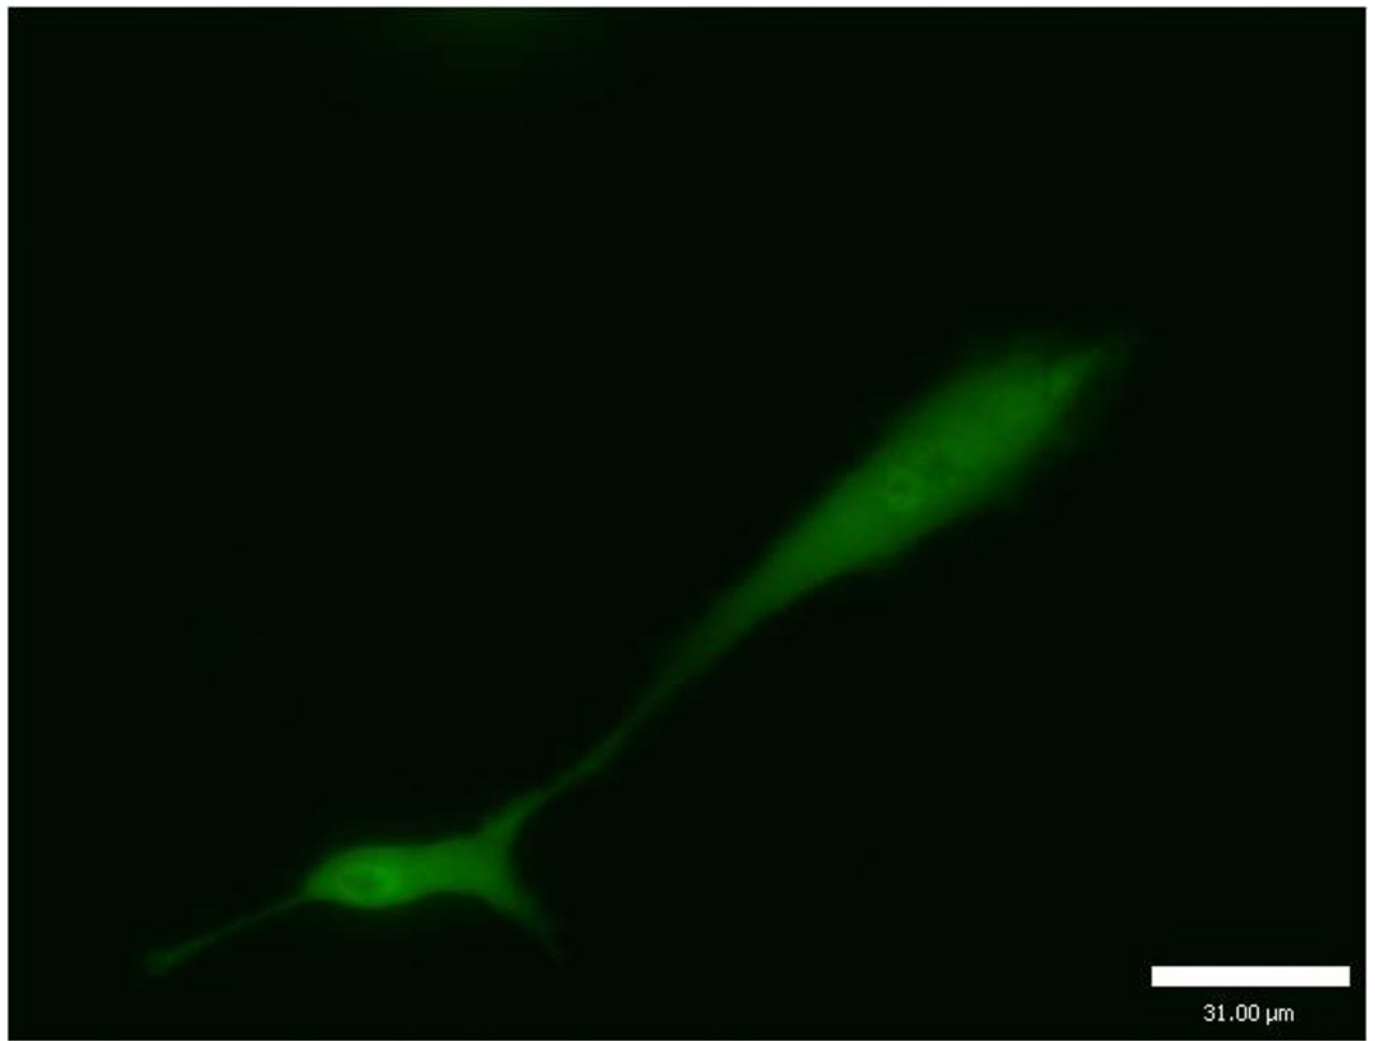

**Movie S2.** PH<sub>AKT</sub>-GFP translocation in U87 cells expressing PTEN<sub>A4</sub>. U87 cells co-transfected with PTEN<sub>A4</sub> and PH<sub>AKT</sub>-GFP. The cells were serum starved 20 h and treated with 20 ng/mL EGF. Localization of the PIP<sub>3</sub> probe PH<sub>AKT</sub>-GFP was assessed.

[Movie S2 \(MOV\)](#)
